# Supplementary material
Source: PubMed Central journal article supplement (PMC7505552)
Supplement: mmc1.pdf [file mmc1.pdf]

# THE LANCET

## Rheumatology

### Supplementary appendix

This appendix formed part of the original submission and has been peer reviewed.  
We post it as supplied by the authors.

Supplement to: Gentry CA, Humphrey MB, Thind SK, et al. Long-term hydroxychloroquine use in patients with rheumatic conditions and development of SARS-CoV-2 infection: a retrospective propensity analysis study. *Lancet Rheumatol* 2020; published online Sept 21. [https://doi.org/10.1016/S2665-9913\(20\)30305-2](https://doi.org/10.1016/S2665-9913(20)30305-2).

## Supplementary material: Prevention of SARS-CoV-2 infection with hydroxychloroquine in patients with rheumatologic conditions

**Table S1. ICD-10 codes included for rheumatoid conditions\***

---

Rheumatoid arthritis: M05.0 –M05.9 and M06.0-M06.9  
Systemic lupus: M32.0 – M32.9  
Cutaneous lupus: L93.0-L93.2  
Systemic Sclerosis: M34.0-M34.9  
Mixed connective tissue disease: M35.8, M35.9  
Sjogrens: M35.0-M35.09  
Undifferentiated connective tissue disease: M35.1, M36.0-M36.8, M65.9  
Polyarthritis unspecified: M12.0-M12.9 and M13.0-M13.89  
Dermatomyositis: M33.0-M33.9, M60.8-M60.9  
Rheumatism, unspec: M79.0  
Palindromic Rheumatism: M12.30-M12.39  
Arthropathies in other spec diseases: M14.8  
Other specific arthropathies, not elsewhere: M12.8

---

\*Diagnoses indicating rheumatoid arthritis, Lupus, polymyositis, connective tissue disease, Inflammatory polyarthritis, Systemic sclerosis, Stills, Palindromic rheumatism, polyarthritis rheumatica, Crest, Sjogren's, Bechet's, Felty's, and Jaccoud's syndromes will be considered specific Rheumatologic conditions. Patients with an ICD10 diagnosis of "arthritis other specified", arthropathy, monoarthritis, polyarthritis, synovitis, myositis, and myalgia will only be included in patients considered having rheumatologic conditions if they also have one of the specific rheumatologic conditions.

**Table S2.** Baseline univariate variables associated with the selection of hydroxychloroquine among patients with ICD10 codes for rheumatologic conditions.

| Baseline variable*                    | Patients receiving hydroxychloroquine (n=10,703) | Patients not receiving hydroxychloroquine (n=59,567) | Standardized mean difference (95% confidence interval) | p      |
|---------------------------------------|--------------------------------------------------|------------------------------------------------------|--------------------------------------------------------|--------|
| <b><u>Rheumatologic condition</u></b> |                                                  |                                                      |                                                        |        |
| Rheumatoid Arthritis                  | 7193 (67.2)                                      | 45047 (75.6)                                         | -0.229 (-0.253, -0.204)                                | <0.001 |
| Lupus                                 | 2642 (24.7)                                      | 6406 (10.8)                                          | 0.552 (0.524, 0.580)                                   | <0.001 |
| Polymyositis                          | 87 (0.81)                                        | 1217 (2.04)                                          | -0.515 (-0.636, -0.395)                                | <0.001 |
| Polyarthritits                        | 208 (1.94)                                       | 927 (1.56)                                           | 0.125 (0.041, 0.208)                                   | 0.004  |
| Sjogren's Syndrome                    | 398 (3.72)                                       | 2239 (3.76)                                          | -0.062 (-0.661, -0.073)                                | 0.84   |
| Bechet's Syndrome                     | 4 (0.04)                                         | 117 (0.20)                                           | -0.916 (-1.47, 0.366)                                  | <0.001 |
| Jaccoud's Syndrome                    | 1 (0.01)                                         | 10 (0.02)                                            | -0.323 (-1.46, 0.810)                                  | 0.99   |
| Connective Tissue Disease             | 422 (3.94)                                       | 932 (1.56)                                           | 0.523 (0.459, 0.588)                                   | <0.001 |
| Crest Syndrome                        | 9 (0.08)                                         | 58 (0.10)                                            | -0.081 (-0.468, 0.306)                                 | 0.68   |
| Felty's Syndrome                      | 12 (0.11)                                        | 74 (0.12)                                            | -0.057 (-0.393, 0.280)                                 | 0.74   |
| Inflammatory Polyarthritits           | 346 (3.23)                                       | 2161 (3.63)                                          | -0.066 (-0.130, -0.002)                                | 0.040  |
| Systemic Sclerosis                    | 75 (0.70)                                        | 702 (1.18)                                           | -0.289 (-0.421, -0.463)                                | <0.001 |
| Stills Disease                        | 4 (0.04)                                         | 31 (0.05)                                            | -0.183 (-0.757, 0.392)                                 | 0.65   |
| Palindromic rheumatism                | 76 (0.71)                                        | 248 (0.42)                                           | 0.296 (0.154, 0.438)                                   | <0.001 |
| Polyarthralgia                        | 246 (2.30)                                       | 2274 (3.82)                                          | -0.288 (-0.362, -0.215)                                | <0.001 |
| <b>Rheumatica</b>                     |                                                  |                                                      |                                                        |        |
| <b><u>Demographics</u></b>            |                                                  |                                                      |                                                        |        |
| Age, mean (SD)                        | 64.8 (12.9)                                      | 66.7 (13.2)                                          | -0.149 (-0.169, -0.128)                                | <0.001 |
| Gender (male)                         | 8029 (75.0)                                      | 48517 (81.4)                                         | -0.210 (-0.236, -0.183)                                | <0.001 |
| Urban (vs. rural) residence           | 6577 (61.5)                                      | 36972 (62.1)                                         | -0.014 (-0.038, 0.009)                                 | 0.22   |
| White race                            | 7292 (68.1)                                      | 41309 (69.4)                                         | -0.031 (-0.056, -0.007)                                | 0.012  |
| <b>Race</b>                           |                                                  |                                                      |                                                        |        |
| White                                 | 7292 (68.1)                                      | 41309 (69.4)                                         |                                                        | <0.001 |
| Black                                 | 2107 (19.7)                                      | 10435 (17.5)                                         |                                                        |        |
| Hispanic                              | 542 (5.06)                                       | 3004 (5.04)                                          |                                                        |        |

|                                                   |             |              |                        |        |
|---------------------------------------------------|-------------|--------------|------------------------|--------|
| <b>Native</b>                                     | 148 (1.38)  | 703 (1.18)   |                        |        |
| <b>American</b>                                   |             |              |                        |        |
| <b>Asian/<br/>Pacific<br/>islander</b>            | 168 (1.57)  | 1007 (1.69)  |                        |        |
| <b>Unknown</b>                                    | 442 (4.13)  | 3109 (5.22)  |                        |        |
| <b>Body mass index (m<sup>2</sup>), Mean (SD)</b> | 30.0 (6.24) | 29.5 (6.09)  | 0.070 (0.049, 0.091)   | <0.001 |
| <b>&lt;25</b>                                     | 2206 (21.4) | 12156 (22.4) |                        |        |
| <b>25-30</b>                                      | 3423 (33.2) | 19425 (35.8) |                        |        |
| <b>&gt;30</b>                                     | 4671 (45.4) | 22683 (41.8) |                        |        |
| <b>Any Tobacco Use</b>                            | 1175 (11.0) | 5988 (10.0)  | 0.054 (0.018, 0.091)   | 0.004  |
| <b><u>Rheumatologic prescriptions</u></b>         |             |              |                        |        |
| <b>Leflunomide</b>                                | 654 (6.11)  | 1695 (2.85)  | 0.440 (0.389, 0.491)   | <0.001 |
| <b>Methotrexate</b>                               | 2214 (20.7) | 7085 (11.9)  | 0.363 (0.334, 0.392)   | <0.001 |
| <b>Sulfasalazine</b>                              | 947 (8.85)  | 1580 (2.65)  | 0.700 (0.455, 0.746)   | <0.001 |
| <b>Any other oral DMARD</b>                       | 3388 (31.6) | 9665 (16.2)  | 0.481 (0.455, 0.506)   | <0.001 |
| <b>Chronic steroid use</b>                        | 1001 (9.35) | 2480 (4.16)  | 0.477 (0.435, 0.519)   | <0.001 |
| <b>Prednisone equivalent &gt;20mg/day</b>         | 51 (0.48)   | 206 (0.35)   | 0.177 (0.008, 0.347)   | 0.047  |
| <b>Any biologic therapy</b>                       | 1548 (14.5) | 7614 (12.8)  | 0.079 (0.046, 0.111)   | <0.001 |
| <b>Other DMARD + biologic</b>                     | 760 (7.10)  | 2975 (4.99)  | 0.206 (0.161, 0.252)   | <0.001 |
| <b>Methotrexate + biologic</b>                    | 473 (4.42)  | 2192 (3.68)  | 0.105 (0.049, 0.161)   | <0.001 |
| <b>Methotrexate + other DMARD + biologic</b>      | 53 (0.50)   | 126 (0.21)   | 0.470 (0.293, 0.648)   | <0.001 |
| <b><u>Other prescriptions of interest</u></b>     |             |              |                        |        |
| <b>Angiotensin-II receptor blocker</b>            | 943 (8.81)  | 3362 (5.64)  | 0.264 (0.223, 0.306)   | <0.001 |
| <b>Angiotensin-II converting enzyme inhibitor</b> | 1551 (14.5) | 5546 (9.31)  | 0.276 (0.243, 0.309)   | <0.001 |
| <b>Vitamin D</b>                                  | 2565 (24.0) | 8248 (13.8)  | 0.371 (0.344, 0.399)   | <0.001 |
| <b>Vitamin C</b>                                  | 186 (1.74)  | 667 (1.12)   | 0.248 (0.156, 0.336)   | <0.001 |
| <b>Zinc</b>                                       | 14 (0.13)   | 78 (0.13)    | -0.001 (-0.314, 0.313) | 0.99   |
| <b><u>Comorbidities</u></b>                       |             |              |                        |        |

|                                                   |             |              |                         |        |
|---------------------------------------------------|-------------|--------------|-------------------------|--------|
| <b>Respiratory</b>                                | 2342 (21.9) | 11862 (19.9) | 0.066 (0.038, 0.093)    | <0.001 |
| <b>Renal/Urinary</b>                              | 2636 (24.6) | 13318 (22.4) | 0.070 (0.043, 0.096)    | <0.001 |
| <b>Cardiovascular</b>                             | 4402 (41.1) | 23906 (40.1) | 0.023 (-0.001, 0.046)   | 0.053  |
| <b>Gastrointestinal</b>                           | 2487 (23.2) | 12650 (21.2) | 0.064 (0.037, 0.091)    | <0.001 |
| <b>Hepatobiliary</b>                              | 337 (3.15)  | 1703 (2.86)  | 0.056 (-0.009, 0.122)   | 0.10   |
| <b>Neurological</b>                               | 3232 (30.2) | 15915 (26.7) | 0.094 (0.070, 0.119)    | <0.001 |
| <b>Dermatological</b>                             | 1706 (15.9) | 8116 (13.6)  | 0.102 (0.070, 0.133)    | <0.001 |
| <b>Metabolic/Endocrine</b>                        | 4547 (42.5) | 26228 (44.0) | -0.035 (-0.058, -0.019) | 0.003  |
| <b>Hematological</b>                              | 1423 (13.3) | 6534 (11.0)  | 0.121 (0.087, 0.154)    | <0.001 |
| <b>Psychiatric</b>                                | 3059 (28.6) | 16026 (26.9) | 0.046 (0.021, 0.071)    | <0.001 |
| <b>Neoplastic</b>                                 | 1379 (12.9) | 6960 (11.7)  | 0.061 (0.027, 0.101)    | <0.001 |
| <b><u>Laboratory abnormalities</u></b>            |             |              |                         |        |
| <b>Elevated alkaline phosphatase</b>              | 142 (1.33)  | 747 (1.25)   | 0.032 (-0.068, 0.131)   | 0.54   |
| <b>Elevated alanine aminotransferase</b>          | 199 (1.86)  | 1279 (2.15)  | -0.081 (-0.164, 0.022)  | 0.052  |
| <b>Elevated aspartate aminotransferase</b>        | 459 (4.29)  | 2371 (3.98)  | 0.043 (-0.013, 0.099)   | 0.14   |
| <b>Elevated lactate dehydrogenase</b>             | 408 (24.2)  | 1275 (2.14)  | 0.328 (0.265, 0.390)    | <0.001 |
| <b>Low hemoglobin</b>                             | 4790 (44.8) | 18467 (31.0) | 0.325 (0.302, 0.348)    | <0.001 |
| <b>Thrombocytopenia</b>                           | 585 (5.47)  | 2668 (4.48)  | 0.115 (0.065, 0.166)    | <0.001 |
| <b>Leukocytosis</b>                               | 558 (5.21)  | 2955 (4.96)  | 0.029 (-0.022, 0.080)   | 0.27   |
| <b>Leukopenia</b>                                 | 172 (1.61)  | 500 (0.84)   | 0.362 (0.266, 0.459)    | <0.001 |
| <b>Elevated urea nitrogen</b>                     | 1098 (10.3) | 5599 (9.40)  | 0.054 (0.016, 0.091)    | 0.006  |
| <b>Elevated creatinine</b>                        | 720 (6.73)  | 3352 (5.63)  | 0.105 (0.059, 0.151)    | <0.001 |
| <b>Elevated erythrocyte sedimentation rate</b>    | 1926 (18.0) | 6078 (10.2)  | 0.362 (0.332, 0.394)    | <0.001 |
| <b>Elevated C-reactive protein &gt; 10 mcg/ml</b> | 691 (6.46)  | 2360 (3.96)  | 0.284 (0.236, 0.332)    | <0.001 |

\* Data presented are number (percent).

† DMARD = Disease modifying anti-rheumatic drug; hydroxychloroquine, methotrexate, lefunomide, and sulfasalazine. "Other DMARD" refers to agents other than hydroxychloroquine.

**Table S3.** Baseline univariate variables associated with the development of SARS-CoV-2 infection from the propensity-matched cohorts of patients receiving hydroxychloroquine and patients not receiving hydroxychloroquine.

| Baseline variable*                    | Patients developing active SARS-CoV-2 infection (n=109) | Patients not developing active SARS-CoV-2 infection (n=32,000) | Standardized mean difference (95% confidence interval) | p      |
|---------------------------------------|---------------------------------------------------------|----------------------------------------------------------------|--------------------------------------------------------|--------|
| <b><u>Rheumatologic condition</u></b> |                                                         |                                                                |                                                        |        |
| Rheumatoid Arthritis                  | 79 (72.5)                                               | 22163 (69.3)                                                   | 0.086 (-0.146, 0.319)                                  | 0.46   |
| Lupus erythematosus                   | 23 (21.1)                                               | 7094 (22.2)                                                    | -0.035 (-0.289, 0.219)                                 | 0.79   |
| Polymyositis                          | 2 (1.83)                                                | 402 (1.26)                                                     | 0.212 (-0.561, 0.985)                                  | 0.40   |
| Polyarthritits                        | 8 (7.34)                                                | 600 (1.88)                                                     | 0.784 (0.385, 1.183)                                   | 0.001  |
| Sjogren's Syndrome                    | 1 (0.92)                                                | 803 (2.51)                                                     | -0.564 (-1.65, 0.523)                                  | 0.53   |
| Bechet's Syndrome                     | 0 (0)                                                   | 6 (0.02)                                                       | --                                                     | 0.99   |
| Jaccoud's Syndrome                    | 0 (0)                                                   | 4 (0.01)                                                       | --                                                     | 0.99   |
| Connective Tissue Disease             | 5 (4.59)                                                | 1083 (3.38)                                                    | 0.175 (-0.321, 0.670)                                  | 0.42   |
| Crest Syndrome                        | 0 (0)                                                   | 16 (0.05)                                                      | --                                                     | 0.99   |
| Felty's Syndrome                      | 0 (0)                                                   | 46 (0.14)                                                      | --                                                     | 0.99   |
| Inflammatory Polyarthritits           | 1 (0.92)                                                | 950 (2.97)                                                     | -0.659 (-1.750, 0.427)                                 | 0.38   |
| Systemic Sclerosis                    | 0 (0)                                                   | 223 (0.70)                                                     | --                                                     | 0.99   |
| Stills Disease                        | 0 (0)                                                   | 15 (0.05)                                                      | --                                                     | 0.99   |
| Palindromic rheumatism                | 1 (0.92)                                                | 237 (0.72)                                                     | 0.136 (-0.952, 1.220)                                  | 0.54   |
| Polyarthralgia                        | 5 (4.59)                                                | 815 (2.55)                                                     | 0.336 (-0.160, 0.832)                                  | 0.21   |
| <b>Rheumatica</b>                     |                                                         |                                                                |                                                        |        |
| <b><u>Demographics</u></b>            |                                                         |                                                                |                                                        |        |
| Age mean, (SD)                        | 63.6 (12.5)                                             | 65.2 (13.2)                                                    | -0.117 (-0.305, 0.071)                                 | 0.093  |
| Gender (male)                         | 80 (73.4)                                               | 24451 (76.4)                                                   | -0.088 (-0.323, 0.146)                                 | 0.46   |
| <b>Race</b>                           |                                                         |                                                                |                                                        |        |
| White                                 | 54 (49.5)                                               | 21459 (67.1)                                                   | -0.402 (-0.610, 0.012)                                 | <0.001 |
| Black                                 | 42 (38.5)                                               | 6529 (20.4)                                                    |                                                        |        |
| Hispanic                              | 6 (5.50)                                                | 1581 (4.94)                                                    |                                                        |        |
| Native                                | 3 (2.75)                                                | 404 (1.26)                                                     |                                                        |        |

|                                                       |             |              |                        |       |
|-------------------------------------------------------|-------------|--------------|------------------------|-------|
| <b>American</b>                                       |             |              |                        |       |
| <b>Asian/<br/>Pacific<br/>islander</b>                | 1 (0.92)    | 514 (1.61)   |                        |       |
| <b>Unknown</b>                                        | 3 (2.75)    | 1513 (4.73)  |                        |       |
| <b>Body mass index (m<sup>2</sup>)</b>                | 31.7 (7.55) | 29.8 (6.20)  | 0.312 (-0.124, 0.502)  | 0.010 |
| <b>Any Tobacco Use</b>                                | 9 (8.26)    | 3463 (10.8)  | -0.165 (-0.541, 0.219) | 0.39  |
| <b><u>Rheumatologic prescriptions</u></b>             |             |              |                        |       |
| <b>Leflunomide</b>                                    | 5 (4.59)    | 1874 (5.86)  | -0.142 (-0.637, 0.353) | 0.84  |
| <b>Methotrexate</b>                                   | 28 (25.7)   | 6675 (20.9)  | 0.150 (-0.088, 0.387)  | 0.23  |
| <b>Sulfasalazine</b>                                  | 4 (3.67)    | 2321 (7.25)  | -0.396 (-0.948, 0.154) | 0.19  |
| <b>Any other oral DMARD<sup>†</sup></b>               | 35 (32.1)   | 9852 (30.8)  | 0.034 (-0.188, 0.256)  | 0.77  |
| <b>Chronic steroid use</b>                            | 11 (10.1)   | 2697 (8.43)  | 0.109 (-0.235, 0.454)  | 0.54  |
| <b>Prednisone equivalent<br/>&gt;20mg/day</b>         | 0 (0)       | 140 (0.44)   | --                     | 0.49  |
| <b>Any biologic therapy</b>                           | 22 (20.2)   | 4754 (14.9)  | 0.205 (-0.054, 0.463)  | 0.14  |
| <b>Other DMARD + biologic</b>                         | 12 (11.0)   | 2431 (7.60)  | 0.225 (-0.106, 0.557)  | 0.21  |
| <b>Methotrexate + biologic</b>                        | 9 (8.26)    | 1568 (4.90)  | 0.308 (-0.070, 0.685)  | 0.14  |
| <b>Methotrexate + other<br/>DMARD + biologic</b>      | 0 (0)       | 145 (0.45)   | --                     | 0.99  |
| <b><u>Other prescriptions of<br/>interest</u></b>     |             |              |                        |       |
| <b>Angiotensin-II receptor<br/>blocker</b>            | 9 (8.26)    | 2738 (8.56)  | -0.021 (-0.398, 0.355) | 0.91  |
| <b>Angiotensin-II converting<br/>enzyme inhibitor</b> | 25 (22.9)   | 4518 (14.1)  | 0.327 (-0.080, 0.574)  | 0.014 |
| <b>Vitamin D</b>                                      | 28 (25.7)   | 7216 (22.6)  | 0.095 (-0.143, 0.332)  | 0.44  |
| <b>Vitamin C</b>                                      | 7 (6.42)    | 505 (1.58)   | 0.802 (0.377, 1.23)    | 0.002 |
| <b>Zinc</b>                                           | 0 (0)       | 53 (0.17)    | --                     | 0.99  |
| <b><u>Comorbidities</u></b>                           |             |              |                        |       |
| <b>Respiratory</b>                                    | 28 (25.7)   | 6743 (21.1)  | 0.142 (-0.095, 0.380)  | 0.25  |
| <b>Renal/Urinary</b>                                  | 33 (30.3)   | 7599 (23.7)  | 0.183 (-0.042, 0.409)  | 0.12  |
| <b>Cardiovascular</b>                                 | 51 (46.8)   | 13246 (41.4) | 0.121 (-0.087, 0.329)  | 0.26  |

|                                                   |           |              |                        |       |
|---------------------------------------------------|-----------|--------------|------------------------|-------|
| <b>Gastrointestinal</b>                           | 30 (27.5) | 7033 (22.0)  | 0.501 (0.269, 0.733)   | 0.17  |
| <b>Hepatobiliary</b>                              | 5 (4.59)  | 983 (3.07)   | 0.230 (-0.266, 0.726)  | 0.39  |
| <b>Neurological</b>                               | 46 (42.2) | 9232 (28.8)  | 0.324 (0.114, 0.534)   | 0.003 |
| <b>Dermatological</b>                             | 12 (11.0) | 5005 (15.6)  | -0.223 (-0.554, 0.108) | 0.16  |
| <b>Metabolic/Endocrine</b>                        | 53 (48.6) | 14015 (43.8) | 0.107 (-0.100, 0.315)  | 0.31  |
| <b>Hematological</b>                              | 11 (10.1) | 4063 (12.7)  | -0.143 (-0.487, 0.201) | 0.40  |
| <b>Psychiatric</b>                                | 41 (37.6) | 9012 (28.2)  | 0.237 (0.233, 0.451)   | 0.033 |
| <b>Neoplastic</b>                                 | 15 (13.8) | 3925 (12.2)  | 0.073 (-0.228, 0.374)  | 0.64  |
| <b><u>Laboratory abnormalities</u></b>            |           |              |                        |       |
| <b>Elevated alkaline phosphatase</b>              | 3 (2.75)  | 475 (1.48)   | 0.348 (-0.287, 0.982)  | 0.22  |
| <b>Elevated alanine aminotransferase</b>          | 5 (4.59)  | 645 (2.02)   | 0.468 (-0.029, 0.965)  | 0.071 |
| <b>Elevated aspartate aminotransferase</b>        | 7 (6.42)  | 1430 (4.47)  | 0.211 (-0.212, 0.634)  | 0.35  |
| <b>Elevated lactate dehydrogenase</b>             | 8 (7.34)  | 1041 (3.25)  | 0.472 (0.074, 0.871)   | 0.038 |
| <b>Low hemoglobin</b>                             | 60 (55.0) | 14020 (43.8) | 0.249 (-0.040, 0.457)  | 0.019 |
| <b>Thrombocytopenia</b>                           | 5 (4.59)  | 1798 (5.62)  | -0.118 (-0.613, 0.378) | 0.83  |
| <b>Leukocytosis</b>                               | 7 (6.42)  | 1818 (5.68)  | 0.072 (-0.351, 0.494)  | 0.74  |
| <b>Leukopenia</b>                                 | 0 (0)     | 463 (1.45)   | --                     | 0.41  |
| <b>Elevated urea nitrogen</b>                     | 14 (12.8) | 3437 (10.7)  | 0.112 (-0.198, 0.422)  | 0.49  |
| <b>Elevated creatinine</b>                        | 12 (11.0) | 2205 (6.89)  | 0.283 (-0.048, 0.614)  | 0.12  |
| <b>Elevated erythrocyte sedimentation rate</b>    | 35 (32.1) | 5392 (16.8)  | 0.467 (0.245, 0.690)   | 0.013 |
| <b>Elevated C-reactive protein &gt; 10 mcg/ml</b> | 18 (16.5) | 1976 (6.18)  | 0.607 (0.326, 0.887)   | 0.002 |

\* Data presented are number (percent).

† DMARD = Disease modifying anti-rheumatic drug; hydroxychloroquine, methotrexate, lefunomide, and sulfasalazine. "Other DMARD" refers to agents other than hydroxychloroquine.
